# Supplementary material for: Removal mechanism and quantitative control of trichloroethylene in a post-plasma-catalytic system over Mn–Ce/HZSM-5 catalysts
Source: Royal Society of Chemistry journal article supplement (doi:10.1039/d1cy00141h), 2021-01-01
Supplement: d1cy00141h1.pdf [file d1cy00141h1.pdf]

1 Removal mechanism and quantitative control of trichloroethylene in  
2 post-plasma-catalytic system over Mn-Ce/HZSM-5 catalysts

3 Tian Chang<sup>1,2,3,4</sup>, Qingcai Chen<sup>1</sup>, Hao Fan<sup>2</sup>, Zhenxing Shen<sup>2\*</sup>, Bin Zhang<sup>2</sup>, Yu Huang<sup>4</sup>,  
4 Savita K.P. Veerapandian<sup>3</sup>, Nathalie De Geyter<sup>3</sup>, Rino Morent<sup>3</sup>

5  
6  
7  
8  
9 <sup>1</sup> *School of Environmental Science and Engineering, Shaanxi University of Science  
10 and Technology, Xi'an 710021, China*

11 <sup>2</sup> *Department of Environmental Science and Engineering, Xi'an Jiaotong University,  
12 Xi'an 710049, China*

13 <sup>3</sup> *Research Unit Plasma Technology, Department of Applied Physics, Faculty of  
14 Engineering and Architecture, Ghent University, Sint-Pietersnieuwstraat 41 – B4,  
15 9000 Ghent, Belgium*

16 <sup>4</sup> *Key Lab of Aerosol Chemistry & Physics, SKLLQG, Institute of Earth Environment,  
17 Chinese Academy of Sciences, Xi'an 710049, China*

18

19

20 *\*Author to whom correspondence should be addressed. E-mail:*

21 *[zxshen@mail.xjtu.edu.cn](mailto:zxshen@mail.xjtu.edu.cn) (Zhenxing Shen), +86 18792765891.*

22

23 **Text S1 The calculation method of TCE removal efficiency, CO<sub>2</sub> yield and CO**  
24 **yield**

25 The TCE removal efficiency ( $\eta_{\text{TCE}}$ ), CO<sub>2</sub> yield ( $Y_{\text{CO}_2}$ ) and CO yield ( $Y_{\text{CO}}$ ) were  
26 calculated as follows:

27 
$$\eta_{\text{TCE}}(\%) = \frac{[\text{TCE}]_{\text{inlet}} - [\text{TCE}]_{\text{outlet}}}{[\text{TCE}]_{\text{inlet}}} \times 100\% \quad (1)$$

28 
$$Y_{\text{CO}_2}(\%) = \frac{[\text{CO}_2]}{2[\text{TCE}]_{\text{inlet}}} \times 100\% \quad (2)$$

29 
$$Y_{\text{CO}}(\%) = \frac{[\text{CO}]}{2[\text{TCE}]_{\text{inlet}}} \times 100\% \quad (3)$$

30 where  $[\text{TCE}]_{\text{inlet}}$  and  $[\text{TCE}]_{\text{outlet}}$  are denoted as the TCE concentrations at the inlet and  
31 outlet of the reactor, respectively;  $[\text{CO}_2]$  and  $[\text{CO}]$  are represented as the CO<sub>2</sub> and CO  
32 concentrations at the exit of the reactor, respectively.

33

34 **Text S2 Electrical measurement method**

35 The reactor was connected to a DC high voltage power supply (SR40-R-1200,  
36 Technix). A high voltage probe (Fluke 80 K-40, division ratio 1/1000) was used to  
37 measure the applied voltage. The discharge current was determined by monitoring the  
38 voltage signal across a 100  $\Omega$  resistor which was put in series between the counter  
39 electrode and ground. The discharge power ( $P$ ) was calculated using the applied  
40 voltage ( $U$ ) and the reactor current ( $I$ ) according to the Eq. (4).

41 
$$P(\text{W}) = U \times I \quad (4)$$

42

43 **Text S3 Catalyst preparation and characterization**

44 The Mn-Ce/HZSM-5 (molar ratio of Ce/Mn=0.2, 0.6, 1 and 1.4) catalysts were  
45 prepared using the deposition–precipitation method. A typical synthesis of Mn-  
46 Ce/HZSM-5 contained the following steps. The  $\text{Ce}(\text{NO}_3)_3 \cdot 6\text{H}_2\text{O}$  and  $\text{Mn}(\text{NO}_3)_2$  were  
47 dissolved in deionized water with continuous stirring. Then, HZSM-5,  $\text{KMnO}_4$  and  
48  $\text{Na}_2\text{CO}_3$  were added to the above mixture successively under stirring. Subsequently,

49 the obtained mixture aged for 4 h at 60 °C. Finally, the above mixture was filtered,  
50 dried overnight at 70 °C, followed by calcination in air at 500 °C for 3 h. The catalyst  
51 samples were donated as MnCe<sub>x</sub>, where x stood for the molar ratio of Ce/Mn.

52 The XRD patterns of all the prepared samples were analyzed by a X-ray powder  
53 diffractometer (PAN analytical, X'pert, Almelo) equipped with a Cu-Kα radiation  
54 source (λ = 1.5406 Å). The Raman spectra were acquired on Confocal Raman  
55 spectroscopy (Lab RAM, HR 800, Horiba, France) using the 514.0 nm radiation from  
56 an argon laser. The quantitative analysis of the element content of all the prepared  
57 samples used an inductively coupled plasma emission spectrometry (E 9000,  
58 Shimadzu). The specific surface area, total pore volume and average pore diameter of  
59 all the prepared samples were obtained via N<sub>2</sub> adsorption–desorption isotherms at 77  
60 K using an SSA-4200 analyzer (Beijing Builder). The morphology of all the prepared  
61 samples was recorded through field-emission scanning electron microscopy (SEM  
62 500, Gemini). The high-resolution transmission electron microscopy (HR-TEM) was  
63 used to measure the dispersion and configuration of catalysts (JEOL, Model JEM-  
64 2100HR instrument, Japan). H<sub>2</sub>-TPR and NH<sub>3</sub>-TPD of all the prepared samples were  
65 both operated on the same Micromeritics AutoChem 2910 instrument equipped with a  
66 thermal conductivity detector (TCD), with 0.05 g catalyst for H<sub>2</sub>-TPR and 0.1 g  
67 catalyst for NH<sub>3</sub>-TPD. XPS was conducted at room temperature on AXIS ULtrabl  
68 XPS (ESCALAB Xi+, Thermo Fisher Scientific) equipment to analyze the oxidation  
69 states of the elements. The C1s photoelectron peak at 284.8 eV was used to check the  
70 binding energy (BE) calibration.

71

72 **Text S4 The second-order polynomial used to fit the modelling response variable**

73

$$Y = \beta_0 + \sum_{i=1}^k \beta_i X_i + \sum_{i=1}^k \beta_{ii} X_i^2 + \sum_{i=1}^{k-1} \sum_{j=2}^k \beta_{ij} X_i X_j + \varepsilon \quad (5)$$

74 Y: the predicted response; k: the number of variables, ε: the residual value; β<sub>0</sub>: the  
75 constant; β<sub>i</sub>: the linear coefficient; β<sub>ii</sub>: the quadratic coefficient; β<sub>ij</sub>: the interaction  
76 coefficient; X<sub>i</sub>, X<sub>j</sub>: the coded independent variables.

77 Figure Captions

78 Fig. S1. EDX mapping of MnCe<sub>1</sub> sample.

79 Fig. S2. Predicted and actual results of (a) TCE removal efficiency, (b) CO<sub>2</sub> yield and

80 (c) CO yield.

81

82

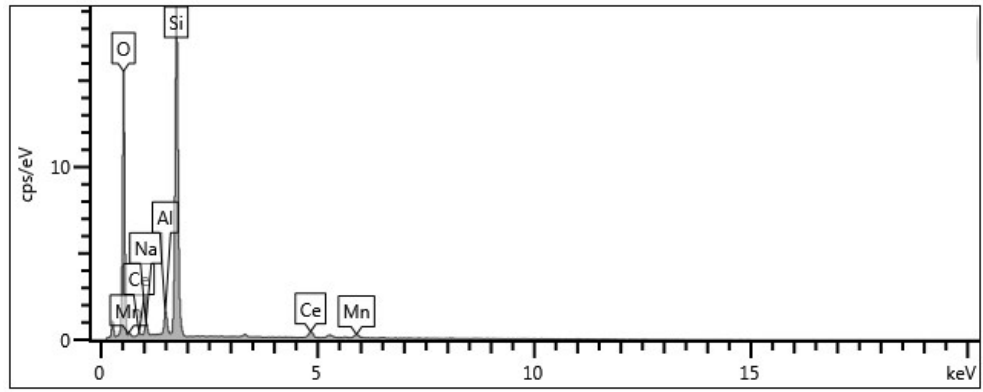

83

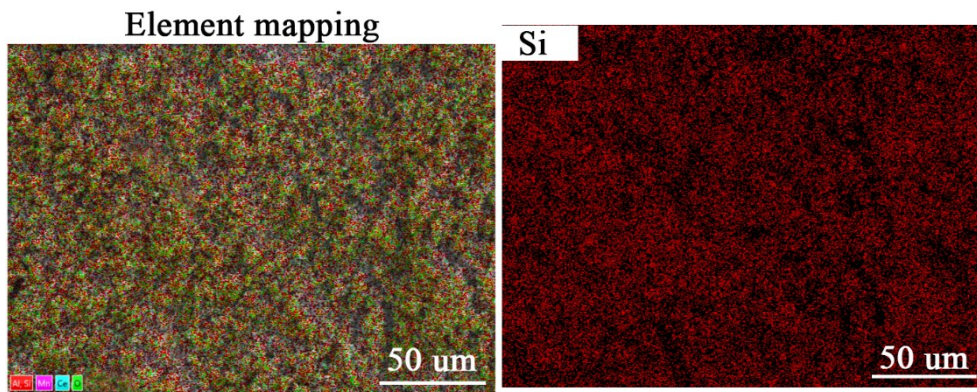

84

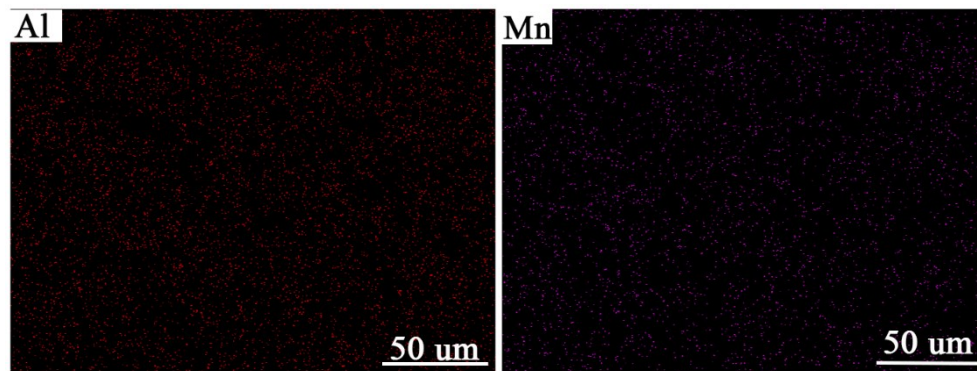

85

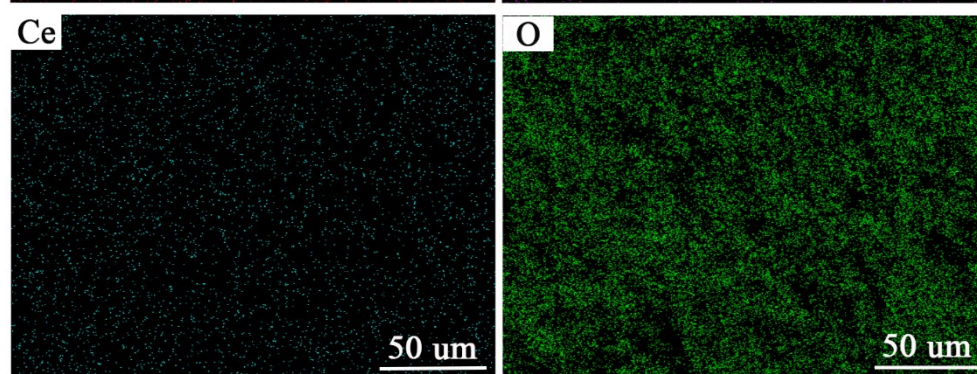

86

Fig. S1. EDX mapping of MnCe<sub>1</sub> sample.

87

88

89

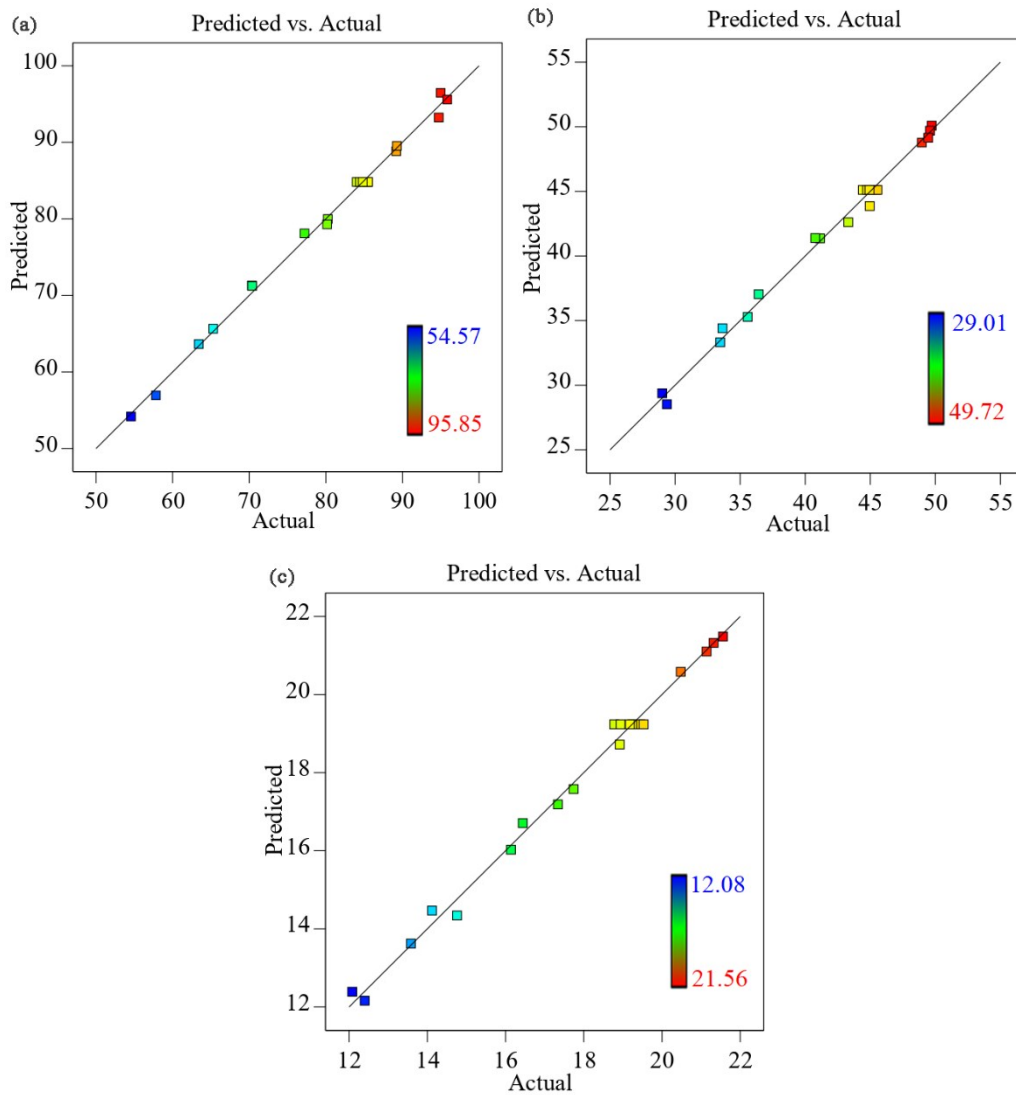

90

91

92 Fig. S2. Predicted and actual results of (a) TCE removal efficiency, (b) CO<sub>2</sub> yield and (c) CO yield.

93
